# Supplementary material for: Parents’ Perceived Treatment Match and Treatment Retention Over 12 Months Among Youths in the LAMS Study
Source: Atypon-hosted journal article supplement (doi:10.1176/appi.ps.201400553), 2015-11-02
Supplement: appi.ps.201400553.ds001.pdf [file appi.ps.201400553.ds001.pdf]

## Appendix

Correlation matrix of independent variables included in the logistic regression analyses.

| <b>Variable<br/>(reference)</b>                                                | <b>1</b> | <b>2</b> | <b>3</b> | <b>4</b> | <b>5</b> | <b>6</b> | <b>7</b> | <b>8</b> | <b>9</b> | <b>10</b> | <b>11</b> | <b>12</b> | <b>13</b> | <b>14</b> |
|--------------------------------------------------------------------------------|----------|----------|----------|----------|----------|----------|----------|----------|----------|-----------|-----------|-----------|-----------|-----------|
| <b>1. Sex (male)</b>                                                           | 1.000    |          |          |          |          |          |          |          |          |           |           |           |           |           |
| <b>2. Ethnicity<br/>(Hispanic/Latino)</b>                                      | .030     | 1.000    |          |          |          |          |          |          |          |           |           |           |           |           |
| <b>3. Race (white)</b>                                                         | -.050    | .033     | 1.000    |          |          |          |          |          |          |           |           |           |           |           |
| <b>4. Age (age 6-7)</b>                                                        | .109*    | -.028    | .101*    | 1.000    |          |          |          |          |          |           |           |           |           |           |
| <b>5. Insurance<br/>(private/self-pay)</b>                                     | .050     | -.016    | .402***  | .096*    | 1.000    |          |          |          |          |           |           |           |           |           |
| <b>6. Primary<br/>caregiver education</b>                                      | .020     | -.012    | .201***  | .012     | .407***  | 1.000    |          |          |          |           |           |           |           |           |
| <b>7. Family structure<br/>(lives with ≤1<br/>biological parent)</b>           | -.050    | .103*    | .339***  | .019     | .361***  | .212***  | 1.000    |          |          |           |           |           |           |           |
| <b>8. Children's<br/>Global Assessment<br/>Scale score</b>                     | .091*    | .011     | .007     | .071     | .118**   | .149**   | .026     | 1.000    |          |           |           |           |           |           |
| <b>9. Number of<br/>diagnoses</b>                                              | -.082    | .070     | .081     | -.044    | .019     | -.050    | .071     | -.466*** | 1.000    |           |           |           |           |           |
| <b>10. Bipolar disorder<br/>(absent)</b>                                       | .140**   | .004     | .077     | -.010    | .063     | .022     | .041     | -.172*** | .155***  | 1.000     |           |           |           |           |
| <b>11. Depressive<br/>disorder (absent)</b>                                    | .029     | .015     | -.032    | .127**   | .006     | -.050    | -.076    | -.191*** | .296***  | -.239***  | 1.000     |           |           |           |
| <b>12. Baseline<br/>treatment type<br/>(medication or<br/>therapy alone)</b>   | -.026    | -.051    | .057     | .082     | .090*    | .047     | .014     | .022     | -.051    | .013      | .023      | 1.000     |           |           |
| <b>13. Parenting Stress<br/>Survey score</b>                                   | -.021    | -.071    | .147**   | .074     | .134**   | .094*    | .024     | -.199*** | .217***  | .175***   | .106*     | .084      | 1.000     |           |
| <b>14. Parent<br/>perceived treatment<br/>match (not well or<br/>somewhat)</b> | -.001    | -.039    | .068     | .021     | .082     | .043     | .121**   | .102*    | -.099*** | .058      | -.067     | .044      | -.037     | 1.000     |

\*p&lt;.05, \*\*p&lt;.01, \*\*\*p&lt;.001

**Child baseline characteristics by 12-month service retention status<sup>a</sup>**

| Characteristic                             | Dropped $\geq 1$ service |    | Retained all services |    | p     |
|--------------------------------------------|--------------------------|----|-----------------------|----|-------|
|                                            | N                        | %  | N                     | %  |       |
| Sex                                        |                          |    |                       |    | ns    |
| Male                                       | 88                       | 69 | 196                   | 68 |       |
| Female                                     | 39                       | 31 | 93                    | 32 |       |
| Ethnicity                                  |                          |    |                       |    | ns    |
| Hispanic or Latino                         | 7                        | 6  | 17                    | 6  |       |
| Not Hispanic or Latino                     | 120                      | 94 | 272                   | 94 |       |
| Race                                       |                          |    |                       |    | <.001 |
| White                                      | 62                       | 51 | 207                   | 72 |       |
| Other                                      | 65                       | 49 | 82                    | 28 |       |
| Age                                        |                          |    |                       |    | ns    |
| 6-7                                        | 32                       | 25 | 76                    | 26 |       |
| 8-12                                       | 95                       | 75 | 213                   | 74 |       |
| Insurance status                           |                          |    |                       |    | ns    |
| Medicaid                                   | 65                       | 51 | 145                   | 50 |       |
| Other                                      | 62                       | 49 | 144                   | 50 |       |
| Primary caregiver education                |                          |    |                       |    | ns    |
| < High school diploma                      | 10                       | 8  | 29                    | 10 |       |
| High school diploma                        | 91                       | 72 | 194                   | 68 |       |
| $\geq$ Bachelor's degree                   | 25                       | 20 | 62                    | 22 |       |
| Family structure                           |                          |    |                       |    | ns    |
| Lives with $\leq 1$ biological parent      | 80                       | 65 | 184                   | 64 |       |
| Other                                      | 44                       | 35 | 103                   | 36 |       |
| CGAS score <sup>b</sup> (M $\pm$ SD)       | 57.7 $\pm$ 11.2          |    | 54.0 $\pm$ 9.6        |    | .023  |
| Number of diagnoses (M $\pm$ SD)           | 2.1 $\pm$ 1.2            |    | 2.5 $\pm$ 1.2         |    | .003  |
| Bipolar disorder                           |                          |    |                       |    | .038  |
| Present                                    | 20                       | 16 | 72                    | 25 |       |
| Not present                                | 107                      | 84 | 217                   | 75 |       |
| Depressive disorder                        |                          |    |                       |    | ns    |
| Present                                    | 19                       | 15 | 50                    | 17 |       |
| Not present                                | 108                      | 85 | 239                   | 83 |       |
| Baseline treatment                         |                          |    |                       |    | ns    |
| Medication or psychotherapy alone          | 98                       | 77 | 235                   | 81 |       |
| Combination                                | 29                       | 23 | 54                    | 19 |       |
| Parenting Stress Survey score (M $\pm$ SD) | 7.9 $\pm$ 4.5            |    | 9.2 $\pm$ 4.2         |    | .003  |

<sup>a</sup>Means were compared by t tests, and proportions were compared by chi square tests.

<sup>b</sup>Children's Global Assessment Scale. Possible scores range from 1 to 100 with lower scores indicating more significant impairment.
